# Supplementary material for: Infection and Activation of B Cells by Theiler’s Murine Encephalomyelitis Virus (TMEV) Leads to Autoantibody Production in an Infectious Model of Multiple Sclerosis
Source: PubMed Central journal article supplement (PMC7465974; doi:10.3390/cells9081787), 2020-07-27
Supplement: cells-09-01787-s001.pdf [file cells-09-01787-s001.pdf]

**Figure S1**

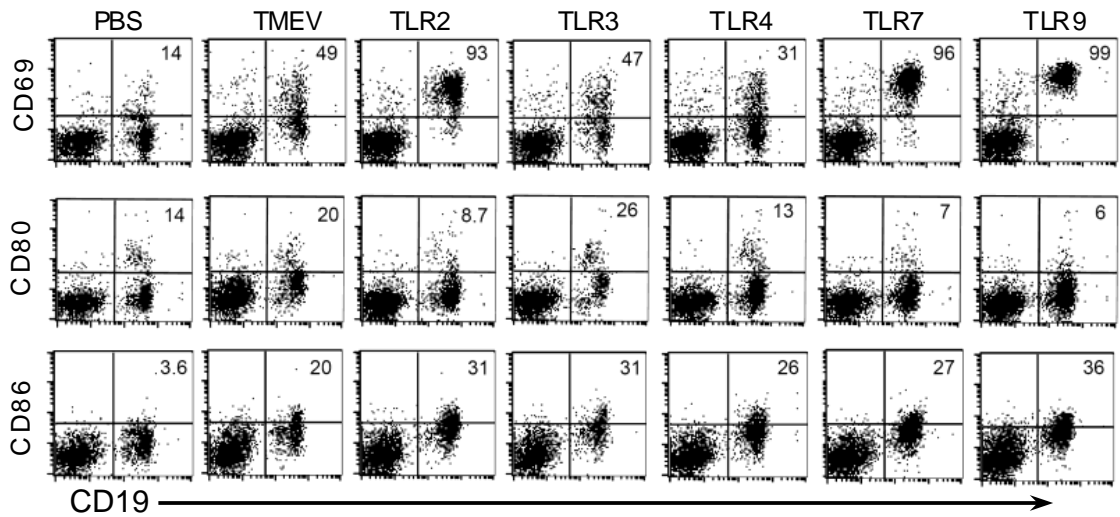

**Figure S1.** Splenic B cells from SJL mice showed upregulated expression of CD80/86 costimulatory molecules and CD69 activation marker up on treatment with ligands of TLR2, TLR3, TLR4, TLR7, and TLR9.
